# Supplementary material for: Backbone effects on the charge transport in poly-imidazole membranes: a theoretical study
Source: Royal Society of Chemistry journal article supplement (doi:10.1039/c3ta01200j), 2013-01-01
Supplement: c3ta01200j.pdf [file c3ta01200j.pdf]

# Backbone effects on the charge transport in poly-imidazole membranes: a theoretical study

Giuseppe Felice Mangiatordi, Damien Laage and Carlo Adamo

## SUPPLEMENTARY INFORMATION

### Contents

1. Force Field calibration.
2. Details on Molecular Dynamics simulation on 15mer.
3. References.
4. Table S1. Atom numbers, GAFF atom types and relative partial charges obtained for 3mer.
5. Table S2. Atom numbers, GAFF atom types and relative partial charges obtained for 15mer.
6. Table S3. Default and modified scaling factors for 1-4 electrostatic and 1-4 van der Waals interactions.
7. Figure S1. DFT (left) and MM (right) potential energy curve for the torsion around the dihedral angle  $\varphi_2$ . MM values have been obtained with the modified GAFF.
8. Figure S2. Time-dependent fluctuations of dihedral  $\varphi_1$ ,  $\varphi_2$  and  $\varphi_3$  extracted from the 80-ns trajectory obtained for the 15mer at 453K.
9. Figure S3. Distribution function and cumulative probability of  $\varphi_1$  computed for the 80 ns trajectory.
10. Figure S4. Distribution function and cumulative probability of  $\varphi_2$  computed for the 80 ns trajectory.
11. Figure S5. Distribution function and cumulative probability of the distance between the hydrogen bonded to the nitrogen atom of Im<sub>1</sub> (H<sub>N</sub>(1)) and the acceptor nitrogen atom of Im<sub>2</sub> (N<sub>A</sub>(2)) computed for the 80 ns trajectory.

## 1. Force Field calibration

According to its orbital hybridization and bonding connectivity, the General Amber Force Field (GAFF)<sup>1,2</sup> assigns an type to each atom. The tables S1 and S2 report the obtained atom numbers, atom types and relatives RESP<sup>3,4</sup> partial charges for the considered molecular systems: 3mer (table S1) and 15mer (table S2). As in the previous investigation on P4VI<sup>5</sup>, all the intramolecular interaction parameters for imidazole reported by Voth and coworkers<sup>6</sup> have been included. Furthermore, in analogy with the previous work, the GAFF has been calibrated on the DFT data obtained for the trimeric model. Notably, in order to accurately reproduce them, different scaling factors with respect to the GAFF default values have been applied to the 1-4 non bonded interactions (Table S3). Figure S1 shows the resulting energetic profile provided using the modified GAFF version (MM single point calculations on the relaxed DFT structures) and the DFT protocol: the MM energy profile obtained has a close shape of that calculated at DFT level.

## 2. Details on Molecular Dynamics simulations on 15mer

In order to minimize spurious effects arising from the consideration of a single polymer chain (i.e coiling during MD simulations) and simulate locally linear rearrangement as in the real system, all the molecular dynamics simulations have been performed keeping fix the carbons of the backbone to the optimized B3LYP/6-31G(d) structure.

Data were sampled every 500 fs and a time-step of 1fs has been used. An equilibration of 0.5 ns has been carried out before 80 ns of MD trajectory performed at 393 and 453 K. All simulations have been performed in the canonical ensemble. In all umbrella sampling calculations<sup>7</sup> carried out for the calculation of the free energy profiles reported in figure 8, dynamics have been run for 2 ns and a force constant for the harmonic bias potential of  $k = 120$  kcal/mol/rad<sup>2</sup> has been used. Windows of 10 degrees have been considered along the reaction coordinates represented by a torsion angle of the investigated system. To determinate the potentials of mean force (PMF) the results have been processed using the weighted histogram analysis method (WHAM).<sup>8,9</sup> The bin dimension applied in the WHAM equation has been equal to 2 degrees.

## References

1. J. Wang, R. M. Wolf, J. W. Caldwell, P. A. Kollman, and D. A. Case, *J Comput Chem*, 2004, **25**, 1157–1174.
2. J. Wang, W. Wang, P. A. Kollman, and D. A. Case, *J. Mol. Graph. Model.*, 2006, **25**, 247–260.
3. C. I. Bayly, P. Cieplak, W. Cornell, and P. A. Kollman, *The Journal of Physical Chemistry*, 1993, **97**, 10269–10280.

4. W. D. Cornell, P. Cieplak, C. I. Bayly, and P. A. Kollmann, *Journal of the American Chemical Society*, 1993, **115**, 9620–9631.
5. G. F. Mangiatordi, V. Butera, N. Russo, D. Laage, and C. Adamo, *Phys. Chem. Chem. Phys.*, 2012, **14**, 10910-10918.
6. H. Chen, T. Yan, and G. A. Voth, *J Phys Chem A*, 2009, **113**, 4507–4517.
7. G. M. Torrie and J. P. Valleau, *Chem. Phys. Lett.*, 1974, **28**, 578–581.
8. S. Kumar, D. Bouzida, R. H. Swendsen, P. A. Kollman and J. M. Rosenberg, *J. Comput. Chem.*, 1992, **13**, 1011-1021.
9. S. Kumar, J. M. Rosenberg, D. Bouzida, R. H. Swendsen and P. A. Kollman, *J. Comput. Chem.*, 1995, **16**, 1339-1350.

**Table S1:** Atom numbers, GAFF atom types and relative RESP partial charges computed for 3mer.

| atom number | GAFF atom type | q (e <sup>-</sup> ) |
|-------------|----------------|---------------------|
| 1           | c3             | 0.060               |
| 2           | hc             | 0.033               |
| 3           | hc             | 0.033               |
| 4           | c3             | -0.473              |
| 5           | hc             | 0.131               |
| 6           | c3             | 0.060               |
| 7           | hc             | 0.033               |
| 8           | hc             | 0.033               |
| 9           | c3             | -0.108              |
| 10          | hc             | 0.098               |
| 11          | cd             | -0.428              |
| 12          | cc             | 0.162               |
| 13          | cd             | 0.649               |
| 14          | cd             | 0.445               |
| 15          | na             | -0.365              |
| 16          | nc             | -0.633              |
| 17          | c3             | -0.308              |
| 18          | hc             | 0.092               |
| 19          | hc             | 0.092               |
| 20          | Hc             | 0.092               |
| 21          | c3             | -0.108              |
| 22          | hc             | 0.098               |
| 23          | c3             | -0.308              |
| 24          | hc             | 0.092               |
| 25          | hc             | 0.092               |
| 26          | hc             | 0.092               |
| 27          | cd             | -0.457              |
| 28          | cd             | 0.445               |
| 29          | na             | -0.189              |
| 30          | na             | -0.189              |
| 31          | nc             | -0.656              |
| 32          | nc             | -0.633              |
| 33          | cd             | -0.457              |
| 34          | cc             | 0.145               |
| 35          | cc             | 0.162               |
| 36          | hn             | 0.330               |
| 37          | hn             | 0.428               |
| 38          | hn             | 0.330               |
| 39          | h4             | 0.247               |
| 40          | h4             | 0.113               |
| 41          | h4             | 0.250               |
| 42          | h4             | 0.115               |
| 43          | h4             | 0.247               |
| 44          | h4             | 0.113               |

**Table S2:** Atom numbers, GAFF atom types and relative RESP partial charges computed for 15mer

| atom number | GAFF atom type | q (e <sup>-</sup> ) |
|-------------|----------------|---------------------|
| 1           | c3             | -0.010              |
| 2           | hc             | 0.026               |
| 3           | hc             | 0.026               |
| 4           | c3             | -0.232              |
| 5           | hc             | 0.088               |
| 6           | c3             | 0.025               |
| 7           | hc             | 0.043               |
| 8           | hc             | 0.043               |
| 9           | c3             | -0.34               |
| 10          | hc             | 0.112               |
| 11          | cd             | -0.375              |
| 12          | cc             | -0.0149             |
| 13          | cd             | 0.425               |
| 14          | cd             | 0.406               |
| 15          | nc             | -0.453              |
| 16          | c3             | 0.153               |
| 17          | hc             | 0.002               |
| 18          | hc             | 0.002               |
| 19          | c3             | -0.008              |
| 20          | hc             | 0.039               |
| 21          | c3             | -0.092              |
| 22          | hc             | 0.021               |
| 23          | hc             | 0.021               |
| 24          | hc             | 0.021               |
| 25          | cd             | 0.009               |
| 26          | cd             | 0.385               |
| 27          | nc             | -0.479              |
| 28          | cd             | -0.314              |
| 29          | cd             | -0.312              |
| 30          | na             | -0.200              |
| 31          | na             | -0.155              |
| 32          | nc             | -0.546              |
| 33          | na             | -0.222              |
| 34          | cc             | 0.0548              |
| 35          | hn             | 0.299               |
| 36          | hn             | 0.298               |
| 37          | hn             | 0.271               |
| 38          | c3             | -0.198              |
| 39          | c3             | 0.222               |

|    |    |        |
|----|----|--------|
| 40 | hc | 0.117  |
| 41 | cd | 0.326  |
| 42 | hc | -0.042 |
| 43 | hc | -0.042 |
| 44 | c3 | -0.305 |
| 45 | nc | -0.538 |
| 46 | na | -0.084 |
| 47 | hc | 0.094  |
| 48 | c3 | 0.073  |
| 49 | cd | 0.420  |
| 50 | cc | 0.076  |
| 51 | cd | -0.380 |
| 52 | hn | 0.215  |
| 53 | hc | 0.033  |
| 54 | hc | 0.033  |
| 55 | c3 | -0.091 |
| 56 | na | -0.206 |
| 57 | nc | -0.467 |
| 58 | hc | 0.089  |
| 59 | cd | 0.315  |
| 60 | cd | -0.318 |
| 61 | hn | 0.288  |
| 62 | cc | -0.015 |
| 63 | nc | -0.585 |
| 64 | na | 0.021  |
| 65 | cc | 0.130  |
| 66 | cd | -0.469 |
| 67 | hn | 0.188  |
| 68 | c3 | -0.174 |
| 69 | c3 | -0.158 |
| 70 | hc | 0.087  |
| 71 | hc | 0.087  |
| 72 | c3 | 0.260  |
| 73 | hc | 0.098  |
| 74 | cd | 0.278  |
| 75 | hc | -0.034 |
| 76 | hc | -0.034 |
| 77 | c3 | -0.537 |
| 78 | nc | -0.471 |
| 79 | na | -0.152 |
| 80 | hc | 0.140  |

|     |    |        |
|-----|----|--------|
| 81  | c3 | 0.260  |
| 82  | cd | 0.472  |
| 83  | cc | 0.007  |
| 84  | cd | -0.281 |
| 85  | hn | 0.286  |
| 86  | hc | -0.034 |
| 87  | hc | -0.034 |
| 88  | c3 | -0.158 |
| 89  | na | -0.189 |
| 90  | nc | -0.534 |
| 91  | hc | 0.098  |
| 92  | cd | 0.278  |
| 93  | c3 | -0.174 |
| 94  | cd | -0.319 |
| 95  | hn | 0.288  |
| 96  | cc | 0.013  |
| 97  | nc | -0.471 |
| 98  | na | -0.152 |
| 99  | hc | 0.087  |
| 100 | hc | 0.087  |
| 101 | cc | 0.007  |
| 102 | cd | -0.281 |
| 103 | hn | 0.286  |
| 104 | c3 | -0.091 |
| 105 | c3 | 0.073  |
| 106 | hc | 0.089  |
| 107 | cd | 0.315  |
| 108 | hc | 0.033  |
| 109 | hc | 0.033  |
| 110 | c3 | -0.305 |
| 111 | nc | -0.585 |
| 112 | na | 0.021  |
| 113 | hc | 0.094  |
| 114 | c3 | 0.222  |
| 115 | cd | 0.420  |
| 116 | cc | 0.130  |
| 117 | cd | -0.469 |
| 118 | hn | 0.188  |
| 119 | hc | -0.042 |
| 120 | hc | -0.042 |
| 121 | c3 | -0.198 |

|     |    |        |
|-----|----|--------|
| 122 | na | -0.206 |
| 123 | nc | -0.467 |
| 124 | hc | 0.117  |
| 125 | cd | 0.326  |
| 126 | c3 | 0.153  |
| 127 | cd | -0.318 |
| 128 | hn | 0.288  |
| 129 | cc | -0.015 |
| 130 | nc | -0.538 |
| 131 | na | -0.084 |
| 132 | hc | 0.002  |
| 133 | hc | 0.002  |
| 134 | cc | 0.076  |
| 135 | cd | -0.380 |
| 136 | hn | 0.215  |
| 137 | c3 | -0.337 |
| 138 | c3 | 0.025  |
| 139 | hc | 0.112  |
| 140 | cd | 0.406  |
| 141 | hc | 0.043  |
| 142 | hc | 0.043  |
| 143 | c3 | -0.232 |
| 144 | nc | -0.453 |
| 145 | na | -0.200 |
| 146 | hc | 0.089  |
| 147 | c3 | -0.010 |
| 148 | cd | 0.425  |
| 149 | cc | -0.015 |
| 150 | cd | -0.314 |
| 151 | hn | 0.299  |
| 152 | hc | 0.026  |
| 153 | hc | 0.026  |
| 154 | c3 | -0.008 |
| 155 | na | -0.155 |
| 156 | nc | -0.546 |
| 157 | cd | 0.385  |
| 158 | cd | -0.375 |
| 159 | hn | 0.271  |
| 160 | cc | 0.055  |
| 161 | nc | -0.479 |
| 162 | na | -0.222 |



|     |    |        |
|-----|----|--------|
| 163 | cc | 0.009  |
| 164 | cd | -0.313 |
| 165 | hn | 0.298  |
| 166 | hc | 0.039  |
| 167 | c3 | -0.092 |
| 168 | hc | 0.021  |
| 169 | hc | 0.021  |
| 170 | hc | 0.021  |
| 171 | h4 | 0.211  |
| 172 | h4 | 0.134  |
| 173 | h4 | 0.229  |
| 174 | h4 | 0.125  |
| 175 | h4 | 0.215  |
| 176 | h4 | 0.138  |
| 177 | h4 | 0.227  |
| 178 | h4 | 0.116  |
| 179 | h4 | 0.220  |
| 180 | h4 | 0.140  |
| 181 | h4 | 0.246  |
| 182 | h4 | 0.113  |
| 183 | h4 | 0.188  |
| 184 | h4 | 0.136  |
| 185 | h4 | 0.216  |
| 186 | h4 | 0.138  |
| 187 | h4 | 0.188  |
| 188 | h4 | 0.136  |
| 189 | h4 | 0.246  |
| 190 | h4 | 0.113  |
| 191 | h4 | 0.220  |
| 192 | h4 | 0.140  |
| 193 | h4 | 0.227  |
| 194 | h4 | 0.116  |
| 195 | h4 | 0.215  |
| 196 | h4 | 0.138  |
| 197 | h4 | 0.229  |
| 198 | h4 | 0.125  |
| 199 | h4 | 0.211  |
| 200 | h4 | 0.134  |

---

**Table S3:** Default and modified scaling factors for 1-4 electrostatic and 1-4 van der Waals interactions.

| Interaction       | scaling factors |          |
|-------------------|-----------------|----------|
|                   | default         | modified |
| 1-4 electrostatic | 0.833           | 0.667    |
| 1-4 van der Waals | 0.500           | 0.100    |

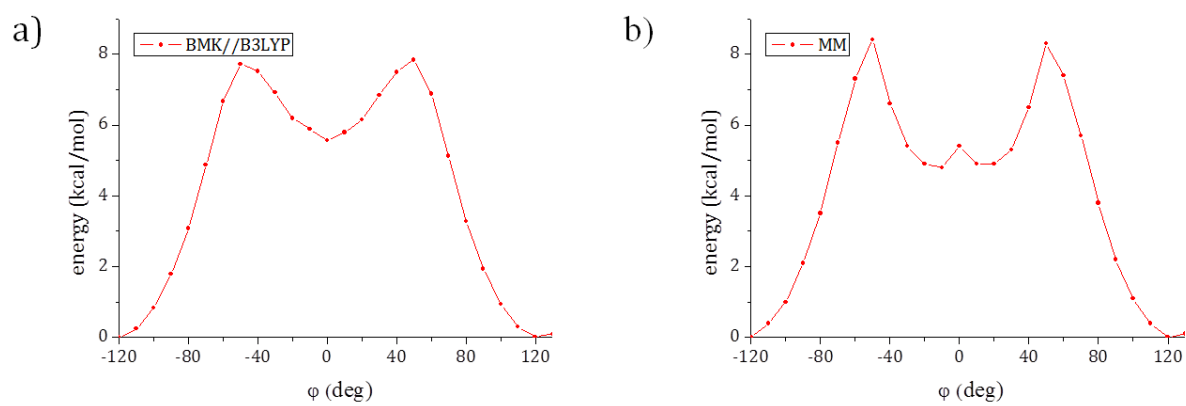

**Figure S1.** DFT (left) and MM (right) potential energy profile for the torsion around the dihedral angle  $\varphi_2$ . MM values have been obtained with the modified GAFF.

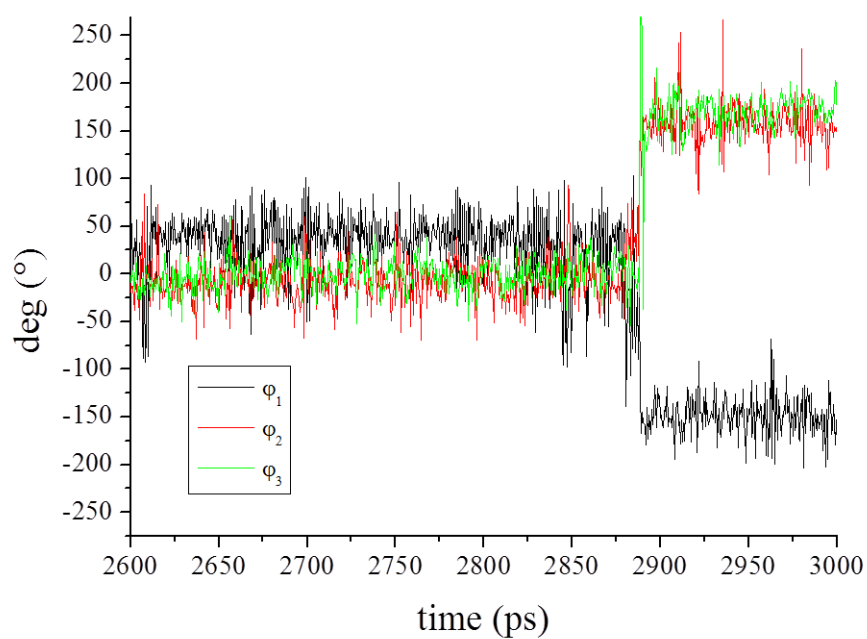

**Figure S2.** Time-dependent fluctuations of dihedral  $\phi_1$   $\phi_2$  and  $\phi_3$  extracted from the 80-ns trajectory obtained for the 15mer at 453K.

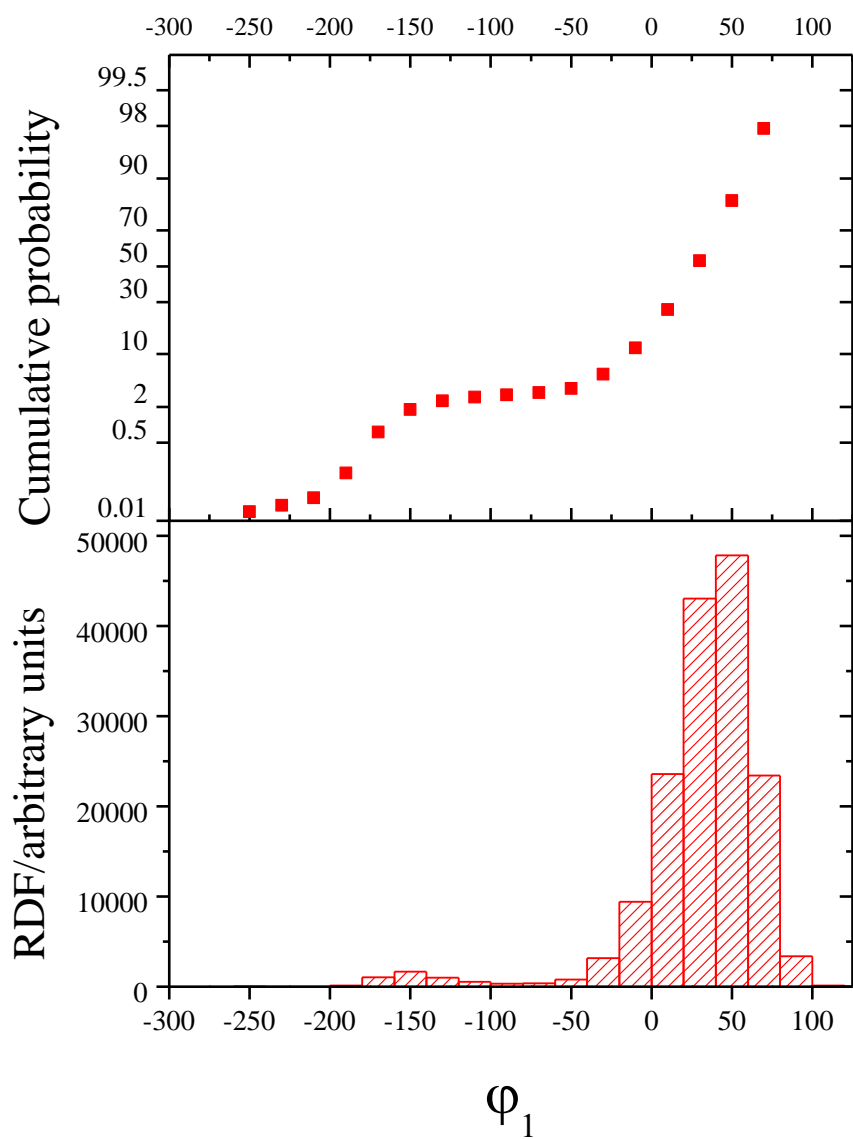

**Figure S3.** Distribution function and cumulative probability of  $\phi_1$  computed for the 80 ns trajectory. All the values are normalized so that the DFT optimized value is referred as  $\phi_1=0$ .

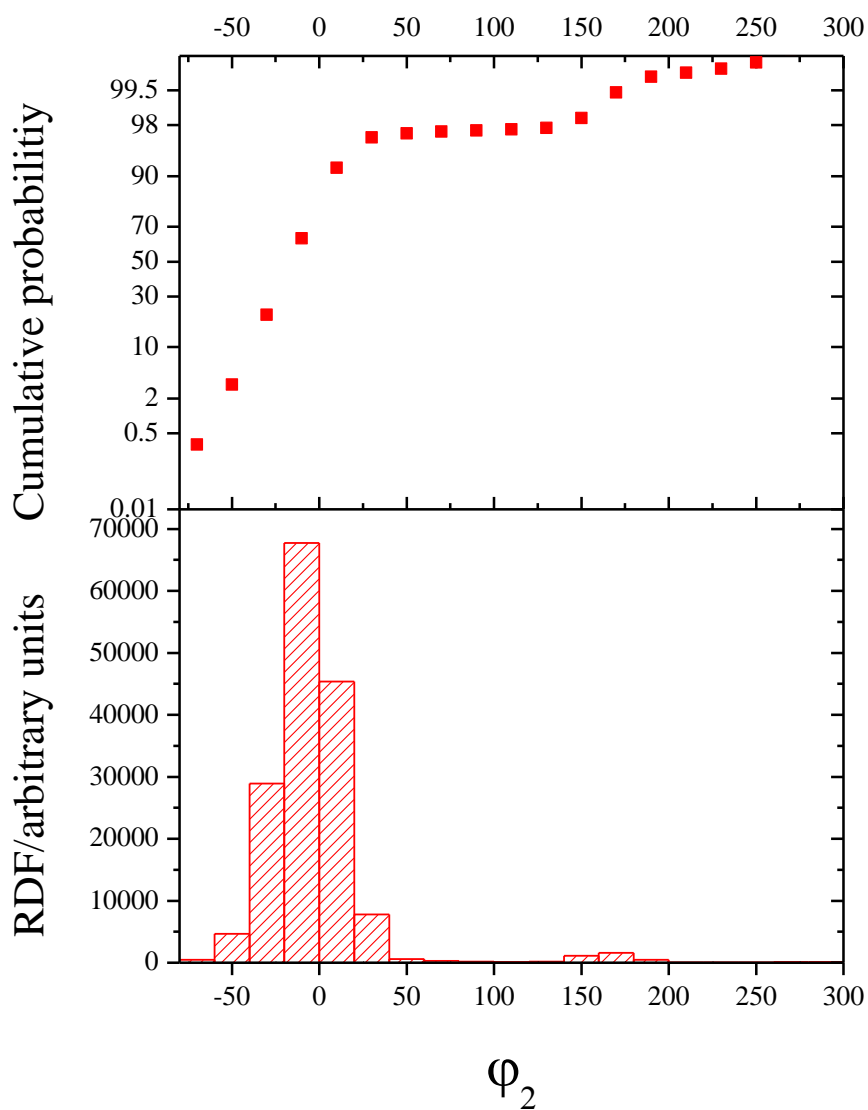

**Figure S5.** Distribution function and cumulative probability of  $\varphi_2$  computed for the 80 ns trajectory. All the values are normalized so that the DFT optimized value is referred as  $\varphi_2=0$ .

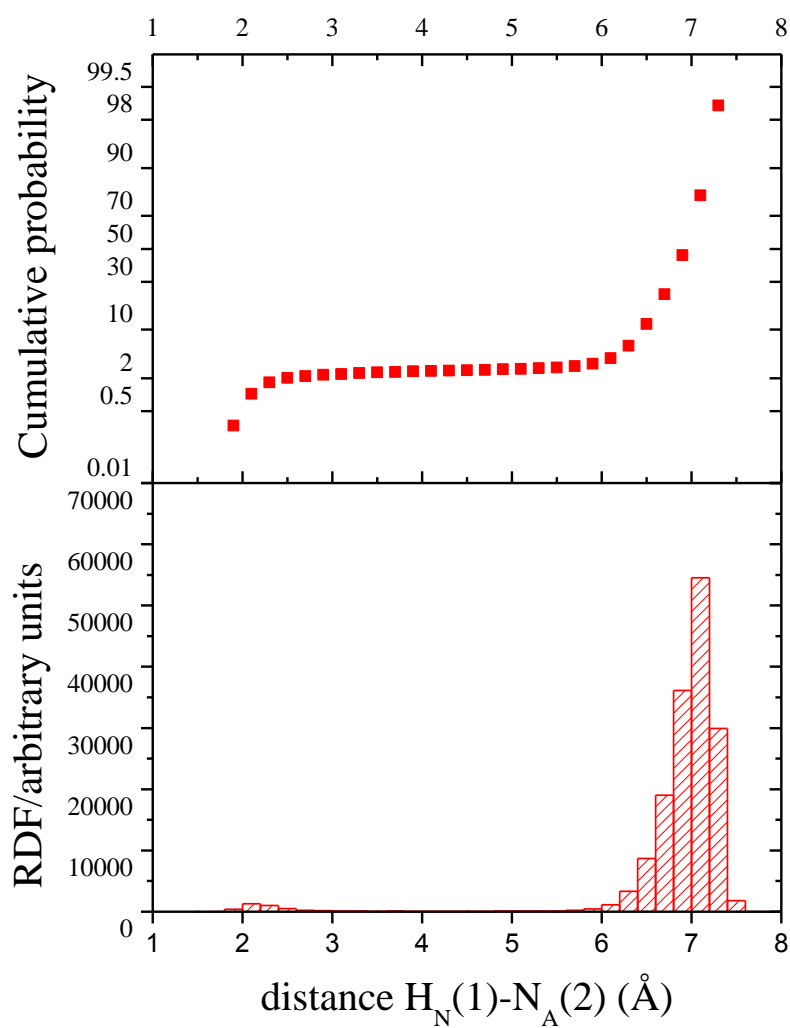

**Figure 11.** Distribution function and cumulative probability of the distance between the hydrogen bonded to the nitrogen atom of Im<sub>1</sub> ( $H_N(1)$ ) and the acceptor nitrogen atom of Im<sub>2</sub> ( $N_A(2)$ ) computed for the 80 ns trajectory.
